# Supplementary material for: SARS-CoV-2 vaccination and myocarditis or myopericarditis: population based cohort study
Source: HighWire-hosted journal article supplement (doi:10.1136/bmj-2021-068665), 2021-12-16

# SUPPLEMENTAL MATERIALS

## SARS-CoV-2 vaccination and myocarditis or myopericarditis: A population based cohort study

### Contents

|                                                                                                                                                                                                                                                                                                                        |    |
|------------------------------------------------------------------------------------------------------------------------------------------------------------------------------------------------------------------------------------------------------------------------------------------------------------------------|----|
| <b>Table S1.</b> Description of study outcomes and covariates.                                                                                                                                                                                                                                                         | 2  |
| <b>Table S2.</b> Hazard ratio of myocarditis/myopericarditis within 28 days following vaccination in the cohort study, by vaccine type and age group.                                                                                                                                                                  | 3  |
| <b>Table S3.</b> Hazard ratio of myocarditis/myopericarditis within 28 days following vaccination in the cohort study, by vaccine type and sex.                                                                                                                                                                        | 3  |
| <b>Table S4.</b> Hazard ratio of myocarditis/myopericarditis within 28 days following vaccination in the cohort study, by vaccine type and vaccine dose number.                                                                                                                                                        | 3  |
| <b>Table S5.</b> Hazard ratio and rate ratio of myocarditis/myopericarditis 29 days or more following vaccination in the cohort study and in the SCCS study by vaccine type.                                                                                                                                           | 4  |
| <b>Table S6.</b> Hazard ratio of a myocarditis/myopericarditis within 28 days following vaccination in the cohort study, by vaccine type, in analyses with late start of follow-up (December 27, 2020).                                                                                                                | 4  |
| <b>Table S7.</b> Hazard ratio of myocarditis/myopericarditis within 28 days following vaccination in the cohort study, by vaccine technology.                                                                                                                                                                          | 4  |
| <b>Table S8.</b> Kaplan-Meier estimates of clinical outcomes among individuals with myocarditis/myopericarditis, by vaccination status, sex, and age.                                                                                                                                                                  | 5  |
| <b>Table S9.</b> Person-years of follow-up in the Danish nationwide population cohort by age group, sex, vaccine dose number, vaccine priority group, and comorbidities, for individuals receiving ChAdOx1 nCoV-19 (AstraZeneca) or Ad26.COV2.S (Johnson & Johnson) vaccines, based on follow-up from October 1, 2020. | 6  |
| <b>Table S10.</b> Hazard ratio of myocarditis/myopericarditis within 28 days following vaccination in the cohort study, for vaccines not included in the national mass-vaccination program.                                                                                                                            | 7  |
| <b>Table S11.</b> Hazard ratio of myocarditis/myopericarditis within 28 days following vaccination in the cohort study, by vaccine type, with follow-up until October 5, 2021, using Firth's bias reduction method.                                                                                                    | 7  |
| <b>Table S12.</b> Hazard ratio of myocarditis/myopericarditis within 28 days following vaccination in the cohort study, by vaccine type, with follow-up until October 5, 2021, without exclusion of prior diagnosis of myocarditis or pericarditis prior to start of follow-up.                                        | 7  |
| <b>Table S13.</b> Hazard ratio of myocarditis/myopericarditis within 28 days following vaccination in the cohort study, by vaccine type, with follow-up until October 5, 2021 and without censoring following a positive SARS-CoV-2 PCR-test.                                                                          | 8  |
| <b>Table S14.</b> Hazard ratio of myocarditis/myopericarditis within 14- and 56-day risk window following vaccination in the cohort study, by vaccine type, with follow-up until October 5, 2021.                                                                                                                      | 8  |
| <b>Table S15.</b> Hazard ratio of cardiac arrest or death within respectively 56-, 84-, and 112-day time windows following vaccination in the cohort study, by vaccine type, with follow-up until October 5, 2021.                                                                                                     | 8  |
| <b>Table S16.</b> Characteristics of individuals who died during follow-up by vaccination status.                                                                                                                                                                                                                      | 9  |
| <b>Table S17.</b> Person-years of follow-up in the Danish nationwide population by SARS-CoV-2 status during follow-up, and by age group, sex, vaccine priority group, and comorbidities based on follow-up from October 1, 2020. <sup>1</sup>                                                                          | 10 |
| <b>Table S18.</b> Hazard ratio of myocarditis/myopericarditis by SARS-CoV-2 status in the cohort study, with follow-up until October 5, 2021.                                                                                                                                                                          | 11 |
| <b>Table S19.</b> Hazard ratio of cardiac arrest or death by SARS-CoV-2 status in the cohort study, with follow-up until October 5, 2021.                                                                                                                                                                              | 11 |
| <b>Figure S1.</b> Flowchart of inclusion in 'myocarditis/myopericarditis' outcome definition.                                                                                                                                                                                                                          | 12 |
| <b>Figure S2.</b> Schematic illustration of follow-up time windows in the cohort study.                                                                                                                                                                                                                                | 13 |
| <b>Figure S3.</b> Temporal timing of myocarditis/myopericarditis events relative to vaccination for the assessment of the self-controlled cases series (SCCS) analysis.                                                                                                                                                | 14 |
| <b>Figure S4.</b> Boxplot of maximum troponin levels among myocarditis/myopericarditis cases by vaccination status.                                                                                                                                                                                                    | 15 |
| <b>Figure S5.</b> Frequency of myocarditis/myopericarditis events relative to SARS-CoV-2 infection.                                                                                                                                                                                                                    | 16 |

| <b>Table S1.</b> Description of study outcomes and covariates.    |                                                                                                  |
|-------------------------------------------------------------------|--------------------------------------------------------------------------------------------------|
| <i>Diagnostic categories<sup>1</sup></i>                          | <b>ICD-10 codes</b>                                                                              |
| Myocarditis                                                       | I40.0, I40.1, I40.9, I41.1, I41.8, I51.4                                                         |
| Pericarditis                                                      | I30.0, I30.8, I30.9, I30.1E                                                                      |
| Asthma                                                            | J45-J46                                                                                          |
| Chronic pulmonary disease (incl. COPD)                            | J40-J44, J47, J60-J67, J68.4, J70.1, J70.3, J84.1, J92.0, J96.1, J98.2, J98.3                    |
| Ischemic heart disease (myocardial infarction or angina pectoris) | I20-I23                                                                                          |
| Heart failure                                                     | I11.0, I13.0, I13.2, I42.0, I42.6, I42.7, I42.8, I42.9, I50.0, I50.1, I50.2, I50.3, I50.8, I50.9 |
| Atrial fibrillation or flutter                                    | I48                                                                                              |
| Diabetes mellitus                                                 | E10.0, E10.1, E10.2-E10.8, E10.9, E11.0, E11.1, E11.2-E11.8, E11.9                               |
| Inflammatory bowel disease                                        | K50, K51                                                                                         |
| Malignancy                                                        | C00-C75, C76-C80, C81-C85, C88, C90, C91-95, C96                                                 |
| Moderate to severe renal disease                                  | I12, I13, N00-N05, N07, N11, N14, N17-N19, Q61                                                   |
| Cardiac arrest                                                    | I46                                                                                              |

<sup>1</sup> The lookback period for diagnoses of malignancy was five years. The remaining categories of comorbidities had a lookback period of ten years.

**Table S2.** Hazard ratio of myocarditis/myopericarditis within 28 days following vaccination in the cohort study, by vaccine type and age group.

|                            | N  | Person-yrs | HR (95% CI)*      | aHR (95% CI)**    |
|----------------------------|----|------------|-------------------|-------------------|
| <b>12-39 years</b>         |    |            |                   |                   |
| Unvaccinated (ref.)        | 59 | 1,420,687  | 1                 | 1                 |
| BNT162b2 (Pfizer-BioNTech) | 17 | 149,192    | 2.38 (1.39-4.08)  | 1.48 (0.74-2.98)  |
| mRNA-1273 (Moderna)        | 16 | 40,875     | 8.40 (4.74-14.89) | 5.24 (2.47-11.12) |
| <b>40-59 years</b>         |    |            |                   |                   |
| Unvaccinated (ref.)        | 39 | 985,432    | 1                 | 1                 |
| BNT162b2 (Pfizer-BioNTech) | 10 | 172,888    | 1.50 (0.75-3.00)  | 1.08 (0.44-2.70)  |
| mRNA-1273 (Moderna)        | ≤3 | 13,347     | 1.08 (0.26-13.92) | 1.40 (0.17-11.16) |
| <b>≥ 60 years</b>          |    |            |                   |                   |
| Unvaccinated (ref.)        | 51 | 807,832    | 1                 | 1                 |
| BNT162b2 (Pfizer-BioNTech) | 21 | 187,510    | 1.76 (1.06-2.93)  | 1.41 (0.74-2.68)  |
| mRNA-1273 (Moderna)        | 4  | 20,219     | 2.86 (1.01-8.08)  | 2.77 (0.90-8.50)  |

\* Adjusted for age and sex.

\*\* Adjusted for age, sex, vaccine priority group, season, and clinical comorbidities.

**Table S3.** Hazard ratio of myocarditis/myopericarditis within 28 days following vaccination in the cohort study, by vaccine type and sex.

|                            | N   | Person-yrs | HR (95% CI)*      | aHR (95% CI)**    |
|----------------------------|-----|------------|-------------------|-------------------|
| <b>Male</b>                |     |            |                   |                   |
| Unvaccinated (ref.)        | 122 | 1,628,595  | 1                 | 1                 |
| BNT162b2 (Pfizer-BioNTech) | 26  | 253,135    | 1.35 (0.88-2.07)  | 0.82 (0.50-1.34)  |
| mRNA-1273 (Moderna)        | 16  | 38,088     | 5.31 (3.09-9.10)  | 3.22 (1.75-5.93)  |
| <b>Female</b>              |     |            |                   |                   |
| Unvaccinated (ref.)        | 33  | 1,585,356  | 1                 | 1                 |
| BNT162b2 (Pfizer-BioNTech) | 22  | 256,455    | 3.79 (2.19-6.56)  | 3.73 (1.82-7.65)  |
| mRNA-1273 (Moderna)        | 5   | 36,352     | 5.70 (2.17-14.97) | 6.33 (2.11-18.96) |

\* Adjusted for age.

\*\* Adjusted for age, vaccine priority group, season, and clinical comorbidities.

**Table S4.** Hazard ratio of myocarditis/myopericarditis within 28 days following vaccination in the cohort study, by vaccine type and vaccine dose number.

|                            | N   | Person-yrs | HR (95% CI)*      | aHR (95% CI)**    |
|----------------------------|-----|------------|-------------------|-------------------|
| Unvaccinated (ref.)        | 155 | 3,213,951  | 1                 | 1                 |
| <b>First dose</b>          |     |            |                   |                   |
| BNT162b2 (Pfizer-BioNTech) | 21  | 249,656    | 1.70 (1.08-2.69)  | 1.30 (0.79-2.14)  |
| mRNA-1273 (Moderna)        | ≤3  | 38,034     | 1.52 (0.48-4.78)  | 1.17 (0.36-3.79)  |
| <b>Second dose</b>         |     |            |                   |                   |
| BNT162b2 (Pfizer-BioNTech) | 27  | 259,934    | 2.09 (1.38-3.15)  | 1.43 (0.88-2.33)  |
| mRNA-1273 (Moderna)        | 18  | 36,406     | 9.52 (5.76-15.74) | 6.99 (3.94-12.42) |

\* Adjusted for age and sex.

\*\* Adjusted for age, sex, vaccine priority group, season, and clinical comorbidities.

**Table S5.** Hazard ratio and rate ratio of myocarditis/myopericarditis 29 days or more following vaccination in the cohort study and in the SCCS study by vaccine type.

|                            | <b>N</b> | <b>Person-yrs</b> | <b>HR (95% CI)*</b>   | <b>aHR (95% CI)**</b>        |
|----------------------------|----------|-------------------|-----------------------|------------------------------|
| <b>Cohort study</b>        |          |                   |                       |                              |
| Unvaccinated (ref.)        | 155      | 3,213,951         | 1                     | 1                            |
| BNT162b2 (Pfizer-BioNTech) | 38       | 796,280           | 0.89 (0.62-1.29)      | 0.47 (0.28-0.79)             |
| mRNA-1273 (Moderna)        | 4        | 79,541            | 0.93 (0.34-2.54)      | 0.57 (0.20-1.66)             |
| <b>SCCS study</b>          |          |                   | <b>RR (95% CI)***</b> | <b>Firth RR (95% CI)****</b> |
| Unvaccinated (ref.)        | 145      |                   | 1                     | 1                            |
| BNT162b2 (Pfizer-BioNTech) | 37       |                   | 0.46 (0.25-0.84)      | 0.47 (0.26-0.85)             |
| mRNA-1273 (Moderna)        | 4        |                   | 0.93 (0.26-3.39)      | 0.99 (0.28-3.55)             |

\* Adjusted for age and sex.

\*\* Adjusted for age, sex, vaccine priority group, season, and clinical comorbidities.

\*\*\* Adjusted for season.

\*\*\*\* Adjusted for season and analysed using Firth's method for bias reduction.

**Table S6.** Hazard ratio of a myocarditis/myopericarditis within 28 days following vaccination in the cohort study, by vaccine type, in analyses with late start of follow-up (December 27, 2020).

|                            | <b>N</b> | <b>Person-years</b> | <b>HR (95% CI)*</b> | <b>aHR (95% CI)**</b> |
|----------------------------|----------|---------------------|---------------------|-----------------------|
| Unvaccinated (ref.)        | 111      | 2,062,220           | 1                   | 1                     |
| BNT162b2 (Pfizer-BioNTech) | 48       | 509,590             | 1.71 (1.21-2.41)    | 1.37 (0.92-2.04)      |
| mRNA-1273 (Moderna)        | 21       | 74,441              | 4.67 (2.88-7.57)    | 3.92 (2.29-6.71)      |

\* Adjusted for age and sex.

\*\* Adjusted for age, sex, vaccine priority group, season, and clinical comorbidities.

**Table S7.** Hazard ratio of myocarditis/myopericarditis within 28 days following vaccination in the cohort study, by vaccine technology.

|                                              | <b>N</b> | <b>Person-yrs</b> | <b>HR (95% CI)*</b> | <b>aHR (95% CI)**</b> |
|----------------------------------------------|----------|-------------------|---------------------|-----------------------|
| Unvaccinated (ref.)                          | 155      | 3,213,951         | 1                   | 1                     |
| BNT162b2 + mRNA-1273 (mRNA)                  | 69       | 584,031           | 2.39 (1.80-3.18)    | 1.64 (1.14-2.36)      |
| ChAdOx1 nCoV-19 + Ad26.COV2.S (viral vector) | ≤3       | 13,387            | 1.88 (0.26-13.47)   | 1.36 (0.18-10.02)     |

\* Adjusted for age and sex.

\*\* Adjusted for age, sex, vaccine priority group, season, and clinical comorbidities.

**Table S8.** Kaplan-Meier estimates of clinical outcomes among individuals with myocarditis/myopericarditis, by vaccination status, sex, and age.

|                                               | <b>Unvaccinated</b> | <b>BNT162b2*</b>   | <b>mRNA-1273*</b>  |
|-----------------------------------------------|---------------------|--------------------|--------------------|
| <b>All</b>                                    | <b>% (95% CI)</b>   | <b>% (95% CI)</b>  | <b>% (95% CI)</b>  |
| In hospital 72 hours after admission (%)      | 47.7 (39.7 - 55.3)  | 58.3 (43.2 - 70.8) | 40.0 (19.3 - 60.0) |
| Readmission within 28 days of discharge (%)   | 15.6 (10.7 - 22.4)  | 12.7 (5.9 - 26.1)  | 0 (0 - 0)          |
| Heart failure within 28 days of outcome** (%) | 4.5 (2.2 - 9.2)     | 2.1 (0.3 - 13.9)   | 0 (0 - 0)          |
| Death within 28 days of outcome (%)           | 1.9 (0.6 - 5.9)     | 2.1 (0.3 - 13.9)   | 0 (0 - 0)          |
| <b>Women</b>                                  |                     |                    |                    |
| In hospital 72 hours after admission (%)      | 51.5 (33.5 - 66.9)  | 54.5 (32.1 - 72.4) | 60.0 (12.6 - 88.2) |
| Readmission within 28 days of discharge (%)   | 33.3 (20 - 52.1)    | 28.2 (13.8 - 52.4) | 0 (0 - 0)          |
| Heart failure within 28 days of outcome** (%) | 3.0 (0.4 - 19.6)    | 0 (0 - 0)          | 0 (0 - 0)          |
| Death within 28 days of outcome (%)           | 3.0 (0.4 - 19.6)    | 0 (0 - 0)          | 0 (0 - 0)          |
| <b>Men</b>                                    |                     |                    |                    |
| In hospital 72 hours after admission (%)      | 46.7 (37.7 - 55.3)  | 61.5 (40.3 - 77.1) | 33.3 (12.2 - 56.4) |
| Readmission within 28 days of discharge (%)   | 10.8 (6.4 - 17.8)   | 0 (0 - 0)          | 0 (0 - 0)          |
| Heart failure within 28 days of outcome** (%) | 4.9 (2.2 - 10.6)    | 3.8 (0.6 - 24.3)   | 0 (0 - 0)          |
| Death within 28 days of outcome (%)           | 1.7 (0.4 - 6.4)     | 3.8 (0.6 - 24.3)   | 0 (0 - 0)          |
| <b>Younger individuals (12-39 years)</b>      |                     |                    |                    |
| In hospital 72 hours after admission (%)      | 44.6 (32.3 - 56.2)  | 58.8 (32.5 - 77.8) | 40.0 (16.5 - 62.8) |
| Readmission within 28 days of discharge (%)   | 6.2 (2.4 - 15.7)    | 5.9 (0.9 - 35)     | 0 (0 - 0)          |
| Heart failure within 28 days of outcome** (%) | 3.1 (0.8 - 11.7)    | 0 (0 - 0)          | 0 (0 - 0)          |
| Death within 28 days of outcome (%)           | 0 (0 - 0)           | 0 (0 - 0)          | 0 (0 - 0)          |
| <b>Older individuals (≥ 40 years)</b>         |                     |                    |                    |
| In hospital 72 hours after admission (%)      | 50.0 (39.3 - 59.8)  | 58.1 (39.0 - 73.1) | 40.0 (5.2 - 75.3)  |
| Readmission within 28 days of discharge (%)   | 22.5 (15.1 - 32.6)  | 16.5 (7.2 - 35.2)  | 0 (0 - 0)          |
| Heart failure within 28 days of outcome** (%) | 5.6 (2.4 - 12.9)    | 3.2 (0.5 - 20.8)   | 0 (0 - 0)          |
| Death within 28 days of outcome (%)           | 3.4 (1.1 - 10.1)    | 3.2 (0.5 - 20.8)   | 0 (0 - 0)          |

\* Cases included from only the 0-28 day time window following SARS-CoV-2 vaccination.

\*\* Defined as a hospital diagnosis of heart failure (as defined in Table S1) within 28 days of outcome.

**Table S9.** Person-years of follow-up in the Danish nationwide population cohort by age group, sex, vaccine dose number, vaccine priority group, and comorbidities, for individuals receiving ChAdOx1 nCoV-19 (AstraZeneca) or Ad26.COV2.S (Johnson & Johnson) vaccines, based on follow-up from October 1, 2020.

|                                                             | <b>ChAdOx1 nCoV-19<br/>(AstraZeneca)<br/>vaccination risk<br/>time</b> | <b>Ad26.COV2.S<br/>(Johnson &amp;<br/>Johnson)<br/>vaccination risk<br/>time</b> |
|-------------------------------------------------------------|------------------------------------------------------------------------|----------------------------------------------------------------------------------|
| <b>Total person-years (%)</b>                               | 32,764 (100%)                                                          | 10,898 (100%)                                                                    |
| <b>Age group</b>                                            |                                                                        |                                                                                  |
| 12-39                                                       | 11,997 (36.6%)                                                         | 9,391 (86.2%)                                                                    |
| 40-59                                                       | 16,889 (51.5%)                                                         | 1,476 (13.5%)                                                                    |
| ≥ 60                                                        | 3,878 (11.8%)                                                          | 31 (0.3%)                                                                        |
| <b>Female</b>                                               | 26,394 (80.6%)                                                         | 1,992 (18.3%)                                                                    |
| <b>Male</b>                                                 | 6,370 (19.4%)                                                          | 8,906 (81.7%)                                                                    |
| <b>Vaccinated with one dose</b>                             | 32,456 (99.1%)                                                         | 10,897 (100%)                                                                    |
| <b>Vaccinated with two doses</b>                            | 309 (0.9%)                                                             | 0 (0%)                                                                           |
| <b>Vaccine priority group<sup>1</sup></b>                   |                                                                        |                                                                                  |
| Vulnerable individuals <sup>2</sup>                         | 8 (0.0%)                                                               | 0 (0.0%)                                                                         |
| Patients with increased risk of severe disease <sup>3</sup> | 20 (0.1%)                                                              | 2 (0.0%)                                                                         |
| Health care workers or similar activity <sup>4</sup>        | 29,066 (88.7%)                                                         | 192 (1.8%)                                                                       |
| Individuals prioritized by age criteria alone               | 3,671 (11.2%)                                                          | 10,704 (98.2%)                                                                   |
| Follow-up time until to December 31, 2020                   | 0 (0.0%)                                                               | 0 (0.0%)                                                                         |
| <b>Comorbidities</b>                                        |                                                                        |                                                                                  |
| Any comorbidity listed below                                | 3,458 (10.6%)                                                          | 456 (4.2%)                                                                       |
| Asthma                                                      | 973 (3.0%)                                                             | 190 (1.7%)                                                                       |
| Chronic pulmonary disease                                   | 225 (0.7%)                                                             | 13 (0.1%)                                                                        |
| Ischemic heart disease                                      | 400 (1.2%)                                                             | 16 (0.1%)                                                                        |
| Heart failure                                               | 87 (0.3%)                                                              | 4 (0.0%)                                                                         |
| Atrial fibrillation or flutter                              | 230 (0.7%)                                                             | 18 (0.2%)                                                                        |
| Diabetes mellitus                                           | 561 (1.7%)                                                             | 68 (0.6%)                                                                        |
| Inflammatory bowel disease                                  | 421 (1.3%)                                                             | 84 (0.8%)                                                                        |
| Malignancy                                                  | 836 (2.6%)                                                             | 53 (0.5%)                                                                        |
| Moderate to severe renal disease                            | 166 (0.5%)                                                             | 30 (0.3%)                                                                        |

<sup>1</sup> Person-years by vaccine priority group from January 1, 2021 are in Table 1 assigned by vaccine priority assessed at February 22, 2021.

<sup>2</sup> Individuals living in care homes or similar facilities, or individuals aged 65 years or older and receiving in-home assistance with activities of daily life.

<sup>3</sup> Individuals clinically determined to be at increased risk of severe disease from SARS-CoV-2 infection.

<sup>4</sup> Individuals working within the health care and social care sectors, and relatives in close contact with individuals at increased risk of severe disease.

**Table S10.** Hazard ratio of myocarditis/myopericarditis within 28 days following vaccination in the cohort study, for vaccines not included in the national mass-vaccination program.

|                                 | <b>N</b> | <b>Person-yrs</b> | <b>HR (95% CI)*</b> | <b>aHR (95% CI)**</b> |
|---------------------------------|----------|-------------------|---------------------|-----------------------|
| Unvaccinated (ref.)             | 155      | 3,213,951         | 1                   | 1                     |
| ChAdOx1 nCoV-19 (AstraZeneca)   | 0        | 10,703            | 0 (0 -)             | 0 (0 -)               |
| Ad26.COV2.S (Johnson & Johnson) | ≤3       | 2,684             | 5.66 (0.79-40.76)   | 5.11 (0.70-37.16)     |

\* Adjusted for age and sex.

\*\* Adjusted for age, sex, vaccine priority group, season, and clinical comorbidities.

**Table S11.** Hazard ratio of myocarditis/myopericarditis within 28 days following vaccination in the cohort study, by vaccine type, with follow-up until October 5, 2021, using Firth's bias reduction method.

|                            | <b>N</b> | <b>Person-yrs</b> | <b>HR (95% CI)*</b> | <b>aHR (95% CI)**</b> |
|----------------------------|----------|-------------------|---------------------|-----------------------|
| Unvaccinated (ref.)        | 155      | 3,213,951         | 1                   | 1                     |
| BNT162b2 (Pfizer-BioNTech) | 48       | 509,590           | 1.92 (1.38-2.66)    | 1.35 (0.91-2.00)      |
| mRNA-1273 (Moderna)        | 21       | 74,441            | 5.46 (3.41-8.74)    | 3.98 (2.33-6.79)      |

\* Adjusted for age and sex, using Firth's bias reduction method.

\*\* Adjusted for age, sex, vaccine priority group, season, and clinical comorbidities, using Firth's bias reduction method.

**Table S12.** Hazard ratio of myocarditis/myopericarditis within 28 days following vaccination in the cohort study, by vaccine type, with follow-up until October 5, 2021, without exclusion of prior diagnosis of myocarditis or pericarditis prior to start of follow-up.

|                            | <b>N</b> | <b>Person-yrs</b> | <b>HR (95% CI)*</b> | <b>aHR (95% CI)**</b> |
|----------------------------|----------|-------------------|---------------------|-----------------------|
| Unvaccinated (ref.)        | 165      | 3,113,744         | 1                   | 1                     |
| BNT162b2 (Pfizer-BioNTech) | 48       | 388,735           | 1.78 (1.28-2.46)    | 1.22 (0.83-1.80)      |
| mRNA-1273 (Moderna)        | 21       | 41,505            | 5.10 (3.20-8.15)    | 3.65 (2.15-6.18)      |

\* Adjusted for age and sex.

\*\* Adjusted for age, sex, vaccine priority group, season, and clinical comorbidities.

\*\*\* Among individuals who previously received a myocarditis or pericarditis diagnosis code during January 1, 2017 to September 30, 2020, none developed our primary outcome within 28 days following vaccination with either BNT162b2 (2,363 individuals) or mRNA-1273 (309 individuals), by the end of follow-up.

**Table S13.** Hazard ratio of myocarditis/myopericarditis within 28 days following vaccination in the cohort study, by vaccine type, with follow-up until October 5, 2021 and without censoring following a positive SARS-CoV-2 PCR-test.

|                            | N   | Person-yrs | HR (95% CI)*     | aHR (95% CI)**   |
|----------------------------|-----|------------|------------------|------------------|
| Unvaccinated (ref.)        | 161 | 3,333,229  | 1                | 1                |
| BNT162b2 (Pfizer-BioNTech) | 49  | 533,186    | 1.84 (1.33-2.54) | 1.29 (0.88-1.91) |
| mRNA-1273 (Moderna)        | 23  | 78,034     | 5.64 (3.59-8.85) | 4.12 (2.47-6.88) |

\* Adjusted for age and sex.

\*\* Adjusted for age, sex, vaccine priority group, season, and clinical comorbidities.

**Table S14.** Hazard ratio of myocarditis/myopericarditis within 14- and 56-day risk window following vaccination in the cohort study, by vaccine type, with follow-up until October 5, 2021.

|                                                         | N   | Person-yrs | HR (95% CI)*      | aHR (95% CI)**    |
|---------------------------------------------------------|-----|------------|-------------------|-------------------|
| <b>Myocarditis/myopericarditis (14-day risk window)</b> |     |            |                   |                   |
| Unvaccinated (ref.)                                     | 155 | 3,213,951  | 1                 | 1                 |
| BNT162b2 (Pfizer-BioNTech)                              | 33  | 263,927    | 2.54 (1.74-3.71)  | 1.89 (1.23-2.90)  |
| mRNA-1273 (Moderna)                                     | 14  | 37,497     | 7.13 (4.07-12.47) | 5.46 (2.97-10.07) |
| <b>Myocarditis/myopericarditis (56-day risk window)</b> |     |            |                   |                   |
| Unvaccinated (ref.)                                     | 155 | 3,213,951  | 1                 | 1                 |
| BNT162b2 (Pfizer-BioNTech)                              | 58  | 804,147    | 1.46 (1.07-1.98)  | 1.05 (0.71-1.56)  |
| mRNA-1273 (Moderna)                                     | 23  | 112,000    | 3.90 (2.48-6.13)  | 3.00 (1.77-5.09)  |

\* Adjusted for age and sex.

\*\* Adjusted for age, sex, vaccine priority group, season, and clinical comorbidities.

**Table S15.** Hazard ratio of cardiac arrest or death within respectively 56-, 84-, and 112-day time windows following vaccination in the cohort study, by vaccine type, with follow-up until October 5, 2021.

|                                           | N      | Person-yrs | HR (95% CI)*     | aHR (95% CI)**   |
|-------------------------------------------|--------|------------|------------------|------------------|
| <b>Cardiac arrest or death (56 days)</b>  |        |            |                  |                  |
| Unvaccinated (ref.)                       | 25,933 | 3,214,646  | 1                | 1                |
| BNT162b2 (Pfizer-BioNTech)                | 8,239  | 804,179    | 0.83 (0.81-0.85) | 0.58 (0.56-0.60) |
| mRNA-1273 (Moderna)                       | 633    | 112,028    | 0.42 (0.39-0.46) | 0.53 (0.49-0.58) |
| <b>Cardiac arrest or death (84 days)</b>  |        |            |                  |                  |
| Unvaccinated (ref.)                       | 25,933 | 3,214,646  | 1                | 1                |
| BNT162b2 (Pfizer-BioNTech)                | 11,496 | 997,788    | 0.87 (0.85-0.89) | 0.59 (0.57-0.60) |
| mRNA-1273 (Moderna)                       | 892    | 128,857    | 0.45 (0.42-0.48) | 0.56 (0.52-0.60) |
| <b>Cardiac arrest or death (112 days)</b> |        |            |                  |                  |
| Unvaccinated (ref.)                       | 25,933 | 3,214,646  | 1                | 1                |
| BNT162b2 (Pfizer-BioNTech)                | 14,779 | 1,118,511  | 0.91 (0.89-0.92) | 0.59 (0.57-0.61) |
| mRNA-1273 (Moderna)                       | 1,149  | 140,227    | 0.47 (0.44-0.50) | 0.57 (0.54-0.61) |

\* Adjusted for age and sex.

\*\* Adjusted for age, sex, vaccine priority group, season, and clinical comorbidities.



**Table S16.** Characteristics of individuals who died during follow-up by vaccination status.

|                                  | <b>Unvaccinated</b> | <b>Vaccinated with<br/>BNT162b2</b> | <b>Vaccinated with<br/>mRNA-1273</b> |
|----------------------------------|---------------------|-------------------------------------|--------------------------------------|
| <b>Total deaths</b>              | 25,641 (84.6%)      | 4,374 (14.4%)                       | 290 (1.0%)                           |
| <b>Sex</b>                       |                     |                                     |                                      |
| Female                           | 11,946 (83.5%)      | 2,236 (15.6%)                       | 127 (0.9%)                           |
| Male                             | 13,695 (85.6%)      | 2,138 (13.4%)                       | 163 (1.0%)                           |
| <b>Age group (years)</b>         |                     |                                     |                                      |
| 12-39                            | 473 (93.8%)         | 26 (5.2%)                           | 5 (1.0%)                             |
| 40-59                            | 2,433 (90.0%)       | 241 (8.9%)                          | 30 (1.1%)                            |
| ≥ 60                             | 22,735 (83.9%)      | 4,107 (15.2%)                       | 255 (0.9%)                           |
| <b>Place of death</b>            |                     |                                     |                                      |
| In-hospital                      | 11,425 (86.0%)      | 1,702 (12.8%)                       | 163 (1.2%)                           |
| Out-of-hospital                  | 14,216 (83.5%)      | 2,672 (15.7%)                       | 127 (0.7%)                           |
| <b>Comorbidities</b>             |                     |                                     |                                      |
| Any of the following             | 16,922 (85.0%)      | 2,820 (14.2%)                       | 173 (0.9%)                           |
| Asthma                           | 862 (83.2%)         | 164 (15.8%)                         | 10 (1.0%)                            |
| Chronic pulmonary disease        | 4,319 (83.1%)       | 830 (16.0%)                         | 51 (1.0%)                            |
| Ischemic heart disease           | 2,770 (83.4%)       | 515 (15.5%)                         | 37 (1.1%)                            |
| Heart failure                    | 3,218 (83.0%)       | 631 (16.3%)                         | 29 (0.7%)                            |
| Atrial fibrillation or flutter   | 5,305 (83.2%)       | 1,010 (15.8%)                       | 60 (0.9%)                            |
| Diabetes mellitus                | 3,843 (85.0%)       | 639 (14.1%)                         | 40 (0.9%)                            |
| Inflammatory bowel disease       | 307 (85.5%)         | 46 (12.8%)                          | 6 (1.7%)                             |
| Malignancy                       | 8,148 (87.6%)       | 1,088 (11.7%)                       | 62 (0.7%)                            |
| Moderate to severe renal disease | 2,518 (84.3%)       | 451 (15.1%)                         | 19 (0.6%)                            |

**Table S17.** Person-years of follow-up in the Danish nationwide population by SARS-CoV-2 status during follow-up, and by age group, sex, vaccine priority group, and comorbidities based on follow-up from October 1, 2020.<sup>1</sup>

|                                                                | <b>Risk time of<br/>individuals who<br/>did not test<br/>positive for<br/>SARS-CoV-2</b> | <b>Risk time of<br/>individuals who<br/>tested positive<br/>for SARS-CoV-2<br/>within 0-28 days<br/>of test</b> | <b>Risk time of<br/>individuals who<br/>tested positive<br/>for SARS-CoV-2<br/>from 29 days of<br/>test</b> |
|----------------------------------------------------------------|------------------------------------------------------------------------------------------|-----------------------------------------------------------------------------------------------------------------|-------------------------------------------------------------------------------------------------------------|
| <b>Total person-years</b>                                      | 3,213,951 (100%)                                                                         | 18,532 (100%)                                                                                                   | 100,746 (100%)                                                                                              |
| <b>Age group</b>                                               |                                                                                          |                                                                                                                 |                                                                                                             |
| 12-39                                                          | 1,420,687 (44.2%)                                                                        | 10,541 (56.9%)                                                                                                  | 61,144 (60.7%)                                                                                              |
| 40-59                                                          | 985,432 (30.7%)                                                                          | 5,576 (30.1%)                                                                                                   | 29,609 (29.4%)                                                                                              |
| ≥ 60                                                           | 807,832 (25.1%)                                                                          | 2,415 (13.0%)                                                                                                   | 9,993 (9.9%)                                                                                                |
| <b>Female</b>                                                  | 1,585,356 (49.3%)                                                                        | 9,275 (50.0%)                                                                                                   | 50,040 (49.7%)                                                                                              |
| <b>Male</b>                                                    | 1,628,595 (50.7%)                                                                        | 9,257 (50.0%)                                                                                                   | 50,706 (50.3%)                                                                                              |
| <b>Vaccine priority group</b>                                  |                                                                                          |                                                                                                                 |                                                                                                             |
| Vulnerable individuals <sup>1</sup>                            | 10,166 (0.3%)                                                                            | 141 (0.8%)                                                                                                      | 442 (0.4%)                                                                                                  |
| Patients with increased risk of<br>severe disease <sup>2</sup> | 18,000 (0.6%)                                                                            | 131 (0.7%)                                                                                                      | 730 (0.7%)                                                                                                  |
| Health care workers or similar<br>activity <sup>3</sup>        | 95,185 (3.0%)                                                                            | 1,045 (5.6%)                                                                                                    | 7,988 (7.9%)                                                                                                |
| Individuals prioritized by age<br>criteria alone               | 1,874,027 (58.3%)                                                                        | 10,088 (54.4%)                                                                                                  | 82,188 (81.6%)                                                                                              |
| <b>Comorbidities</b>                                           | 1,216,573 (37.9%)                                                                        | 7,128 (38.5%)                                                                                                   | 9,399 (9.3%)                                                                                                |
| Any comorbidity listed below                                   |                                                                                          |                                                                                                                 |                                                                                                             |
| Asthma                                                         | 462,660 (14.4%)                                                                          | 2,143 (11.6%)                                                                                                   | 10,269 (10.2%)                                                                                              |
| Chronic pulmonary disease                                      | 88,902 (2.8%)                                                                            | 594 (3.2%)                                                                                                      | 3,246 (3.2%)                                                                                                |
| Ischemic heart disease                                         | 57,931 (1.8%)                                                                            | 222 (1.2%)                                                                                                      | 909 (0.9%)                                                                                                  |
| Heart failure                                                  | 80,173 (2.5%)                                                                            | 322 (1.7%)                                                                                                      | 1,462 (1.5%)                                                                                                |
| Atrial fibrillation or flutter                                 | 33,433 (1.0%)                                                                            | 132 (0.7%)                                                                                                      | 497 (0.5%)                                                                                                  |
| Diabetes mellitus                                              | 76,690 (2.4%)                                                                            | 293 (1.6%)                                                                                                      | 1,158 (1.1%)                                                                                                |
| Inflammatory bowel disease                                     | 90,096 (2.8%)                                                                            | 439 (2.4%)                                                                                                      | 2,060 (2.0%)                                                                                                |
| Malignancy                                                     | 32,506 (1.0%)                                                                            | 171 (0.9%)                                                                                                      | 871 (0.9%)                                                                                                  |
| Moderate to severe renal disease                               | 118,298 (3.7%)                                                                           | 446 (2.4%)                                                                                                      | 1,897 (1.9%)                                                                                                |

<sup>1</sup> Individuals living in care homes or similar facilities, or individuals aged 65 years or older and receiving in-home assistance with activities of daily life.

<sup>2</sup> Individuals clinically determined to be at increased risk of severe disease from SARS-CoV-2 infection.

<sup>3</sup> Individuals working within the health care and social care sectors, and relatives in close contact with individuals at increased risk of severe disease.

**Table S18.** Hazard ratio of myocarditis/myopericarditis by SARS-CoV-2 status in the cohort study, with follow-up until October 5, 2021.

|                            | <b>N</b> | <b>Person-ys</b> | <b>HR (95% CI)*</b> | <b>aHR (95% CI)**</b> |
|----------------------------|----------|------------------|---------------------|-----------------------|
| Uninfected (ref.)          | 155      | 3,213,951        | 1                   | 1                     |
| SARS-CoV-2 PCR-positive*** | ≤3       | 18,532           | 2.27 (0.56-9.15)    | 2.09 (0.52-8.47)      |

\* Adjusted for age and sex.

\*\* Adjusted for age, sex, vaccine priority group, season, and clinical comorbidities.

\*\*\* Within 0-28 days of positive SARS-CoV-2 PCR-test.

**Table S19.** Hazard ratio of cardiac arrest or death by SARS-CoV-2 status in the cohort study, with follow-up until October 5, 2021.

|                            | <b>N</b> | <b>Person-ys</b> | <b>HR (95% CI)*</b> | <b>aHR (95% CI)**</b> |
|----------------------------|----------|------------------|---------------------|-----------------------|
| Uninfected (ref.)          | 25,933   | 3,214,646        | 1                   | 1                     |
| SARS-CoV-2 PCR-positive*** | 1,532    | 18,538           | 17.53 (16.64-18.46) | 13.64 (12.94-14.38)   |

\* Adjusted for age and sex.

\*\* Adjusted for age, sex, vaccine priority group, season, and clinical comorbidities.

\*\*\* Within 0-28 days of a positive SARS-CoV-2 PCR-test.

**Figure S1.** Flowchart of inclusion in ‘myocarditis/myopericarditis’ outcome definition. By A) myocarditis or pericarditis diagnosis only, B) myocarditis diagnosis only, and C) pericarditis diagnosis only\*. Only cases within 0-28 days of vaccination are included among SARS-CoV-2 mRNA vaccinated.

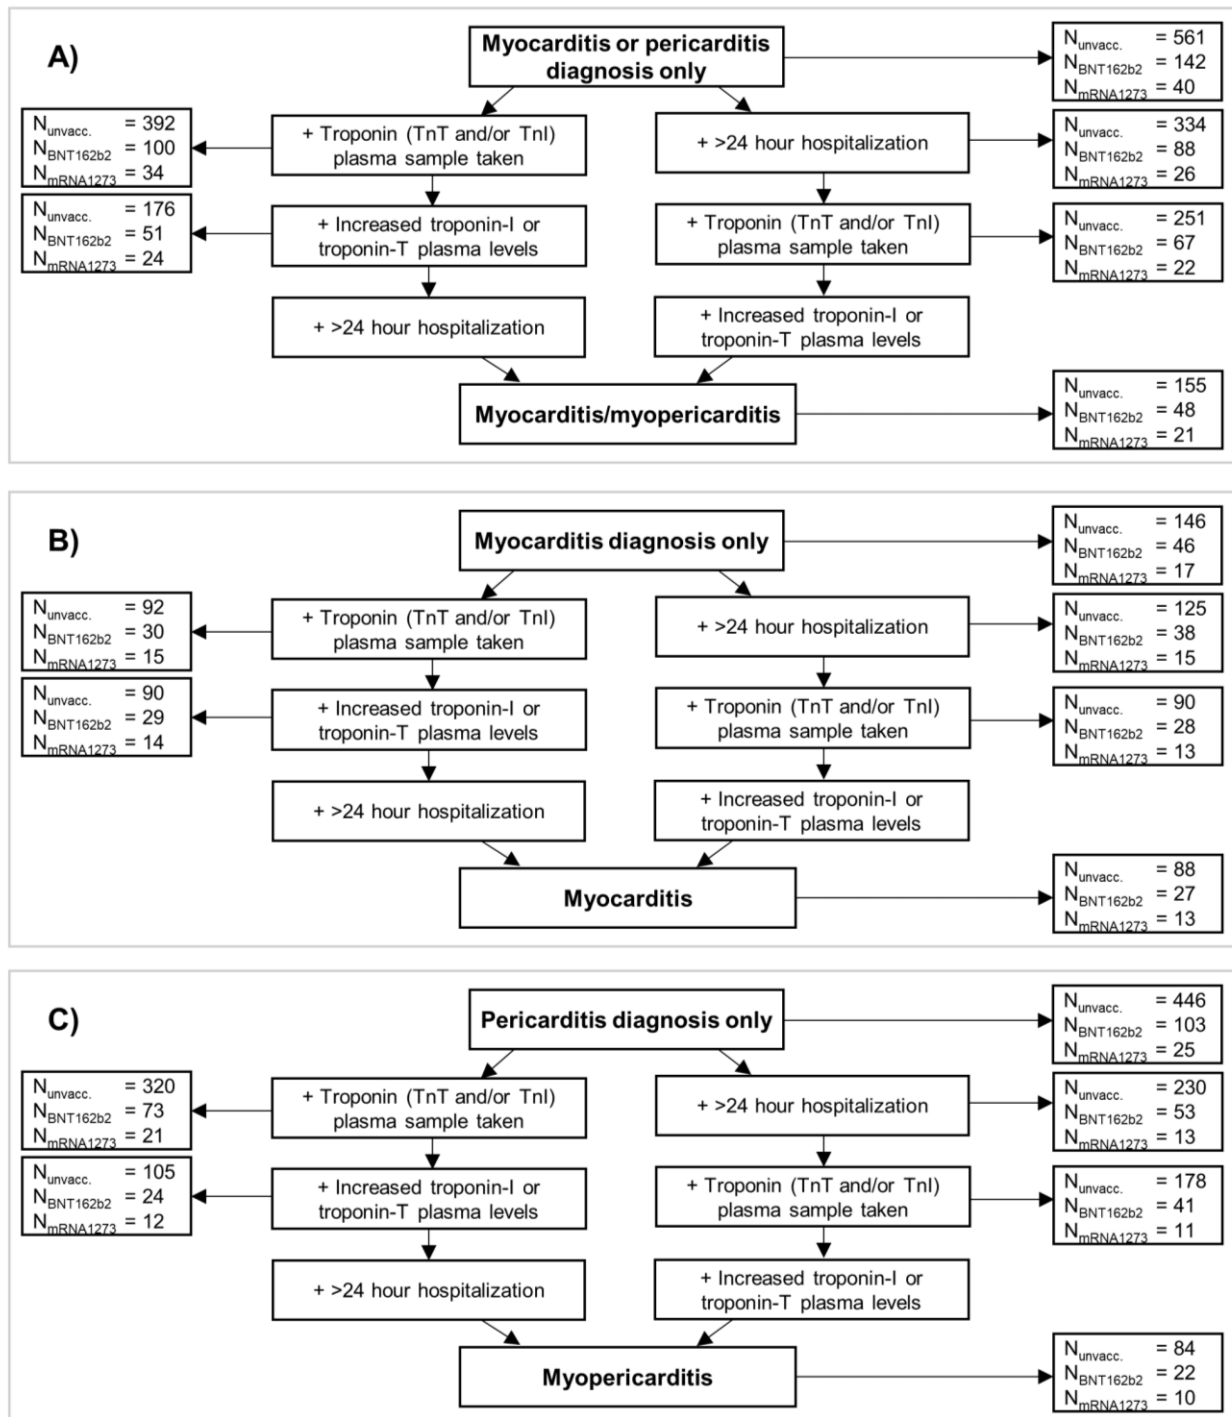

\* The number of ‘myocarditis/myopericarditis’ events by ICD-10 code were: I40.0 ( $\leq 3$ ), I40.1 ( $\leq 3$ ), I40.9 (68), I41.1 ( $\leq 3$ ), I41.8 ( $\leq 3$ ), I51.4 (40), I30.0 (57), I30.8 ( $\leq 3$ ), I30.9 (47), and I30.1E ( $\leq 3$ ). Minor differences between the events described in flowchart and in statistical analyses are attributable to readmissions and differential censoring in different analyses.

**Figure S2.** Schematic illustration of follow-up time windows in the cohort study. For an individual who was A) vaccinated with a first dose on May 15, 2021, a second dose on June 20, 2021, and was followed until end of follow-up on October 5, 2021; B) not vaccinated and followed until end of follow-up; C) vaccinated with a first dose on May 15, 2021, a second dose on June 20, 2021, and experienced an event on July 3, 2021; and D) not vaccinated and experienced an event on July 3, 2021.\*

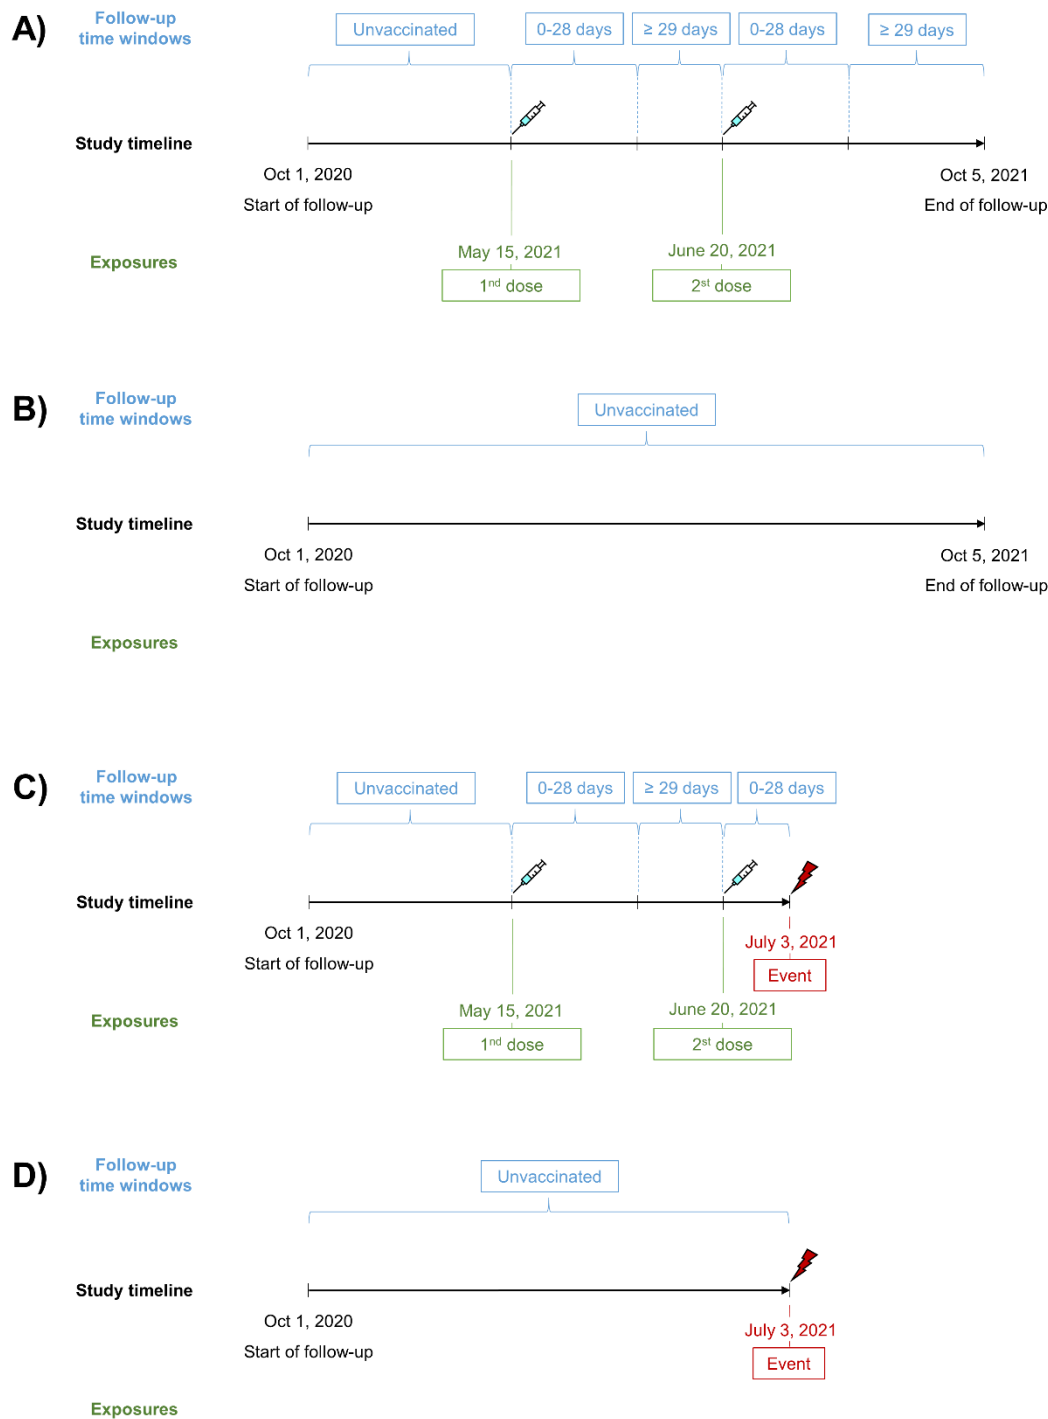

\*The 28-day time window following the first dose was shortened if the second vaccine dose was received within the 28 days, when the 28-day time window of the second dose would start. In this case, the '0-28 days' follow-up time windows following both doses would consist of less than 56 days in total.

**Figure S3.** Temporal timing of myocarditis/myopericarditis events relative to vaccination for the assessment of the self-controlled cases series (SCCS) analysis. Frequency of ‘myocarditis/myopericarditis’ events in each week relative to the day of vaccination (the week of vaccination starts from day 0, the day of vaccination, a day 6 following vaccination), by vaccine type and dose. In total, 3,482,295 were vaccinated a first dose of BNT162b2 and 3,417,744 with a second dose of BNT162b2, while 498,814 were vaccinated with a first dose of mRNA-1273 and 483,270 were vaccinated with a second dose of mRNA-1273.

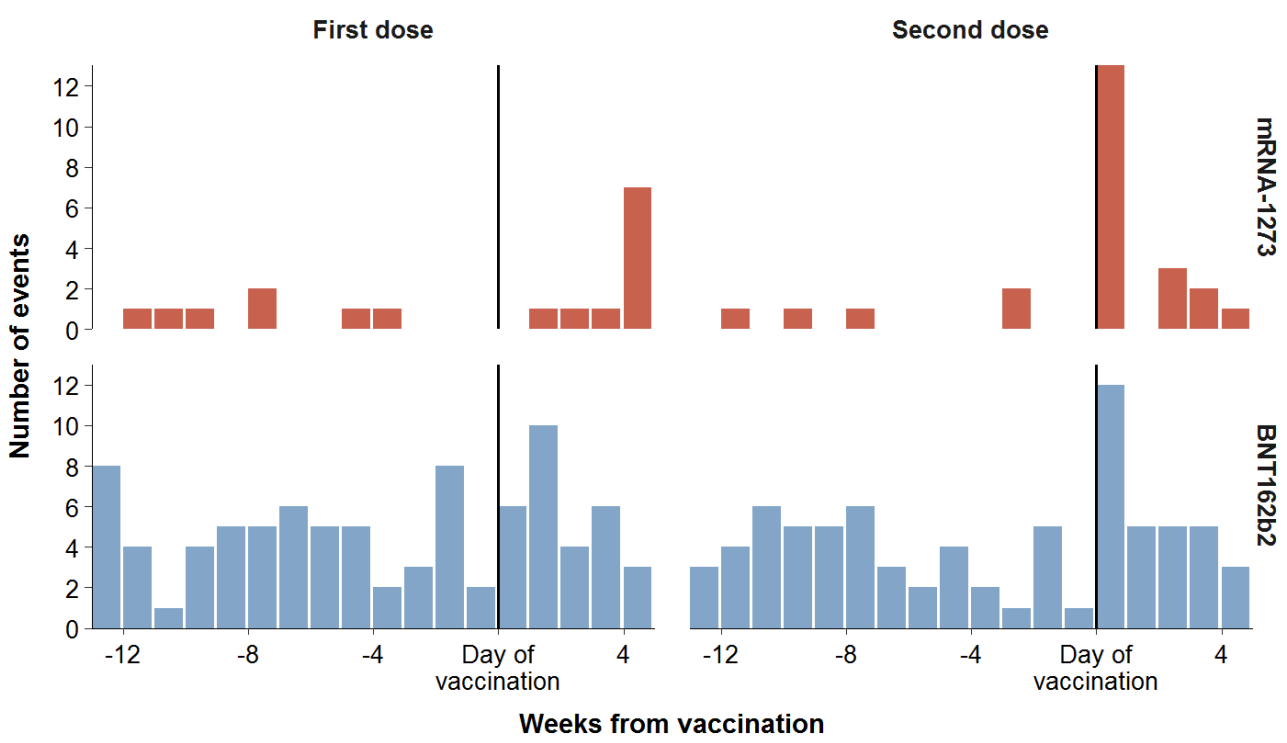

**Figure S4.** Boxplot of maximum troponin levels among myocarditis/myopericarditis cases by vaccination status. Only cases within 0-28 days of vaccination are included among SARS-CoV-2 mRNA vaccinated. The assay-specific upper normal limits were used as cut-offs for defining increased troponin-I and troponin-T levels.

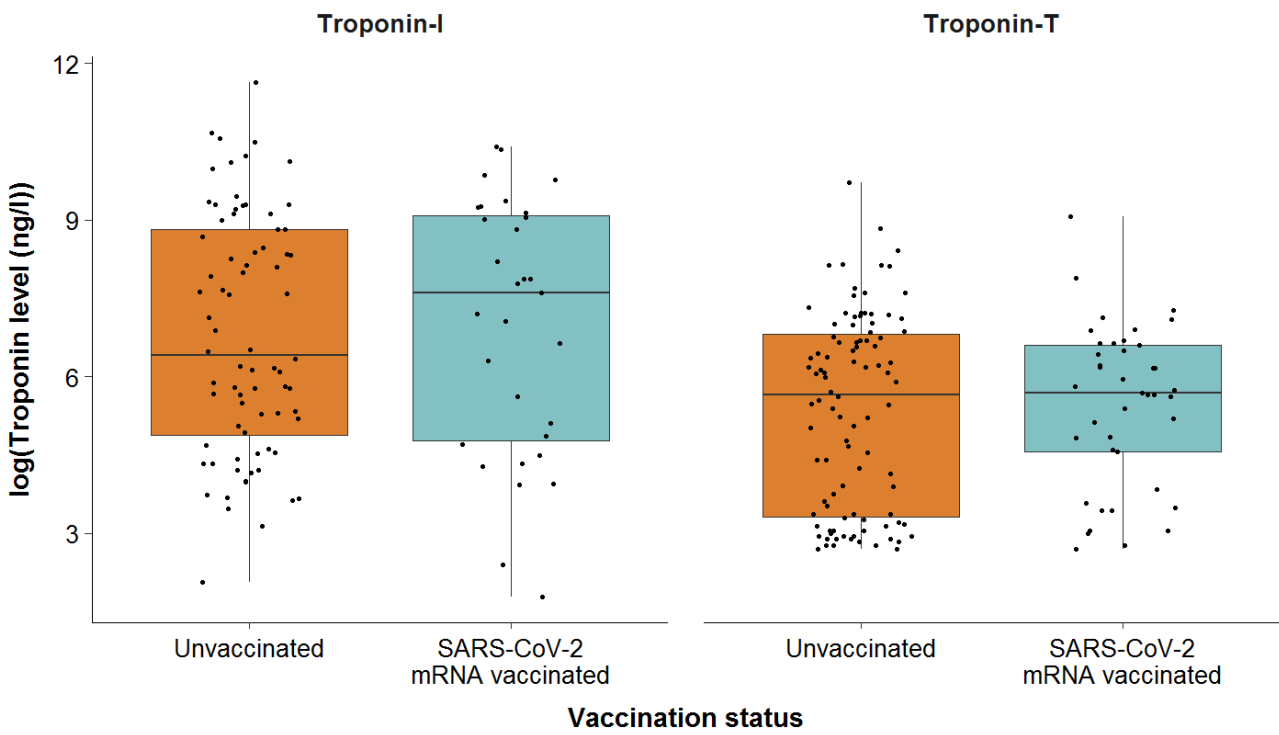

**Figure S5.** Frequency of myocarditis/myopericarditis events relative to SARS-CoV-2 infection. Events relative to the week of a positive SARS-CoV-2 PCR-test (day 1-7 following a positive SARS-CoV-2 PCR-test).

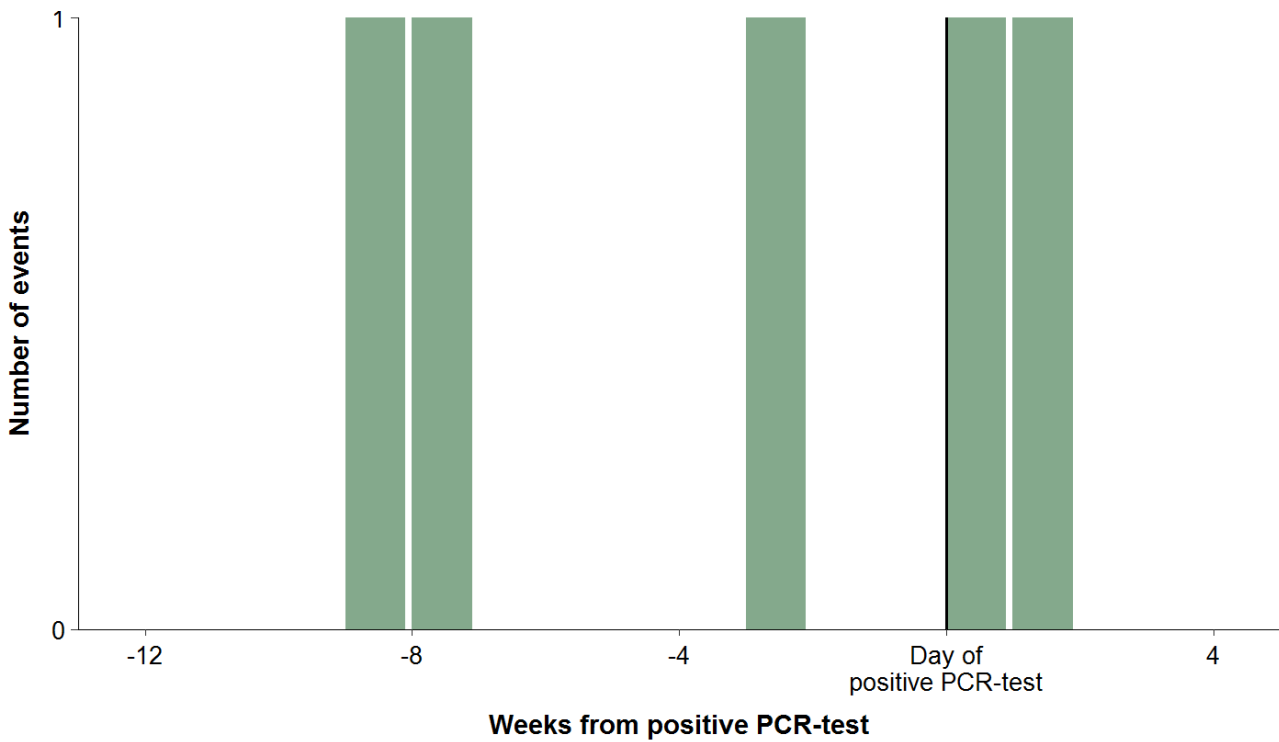

Supplement: husa068665.ww.pdf [file husa068665.ww.pdf]
